# Supplementary material for: Impact of Non-Covalent Interactions of Chiral Linked Systems in Solution on Photoinduced Electron Transfer Efficiency
Source: MDPI journal article supplement (doi:10.3390/ijms24119296), 2023-05-26
Supplement: s1 [file s1]

## SUPPLEMENTARY MATERIALS

### Impact of Non-Covalent Interactions of Chiral Linked Systems in Solution on Photoinduced Electron Transfer Efficiency

Ilya M. Magin<sup>1</sup>, Ivan A. Pushkin<sup>1,2</sup>, Aleksandra A. Ageeva<sup>1,2</sup>, Sofia O. Martianova<sup>1,2</sup>, Nikolay E. Polyakov<sup>1</sup>, Alexander B. Doktorov<sup>1\*</sup> and Tatyana V. Leshina<sup>1</sup>

<sup>1</sup>Voevodsky Institute of Chemical Kinetics and Combustion, 630090 Novosibirsk, Russia;

<sup>2</sup>Department of Natural Sciences, Novosibirsk State University, 630090 Novosibirsk, Russia

\* Correspondence: doktorov@kinetics.nsc.ru

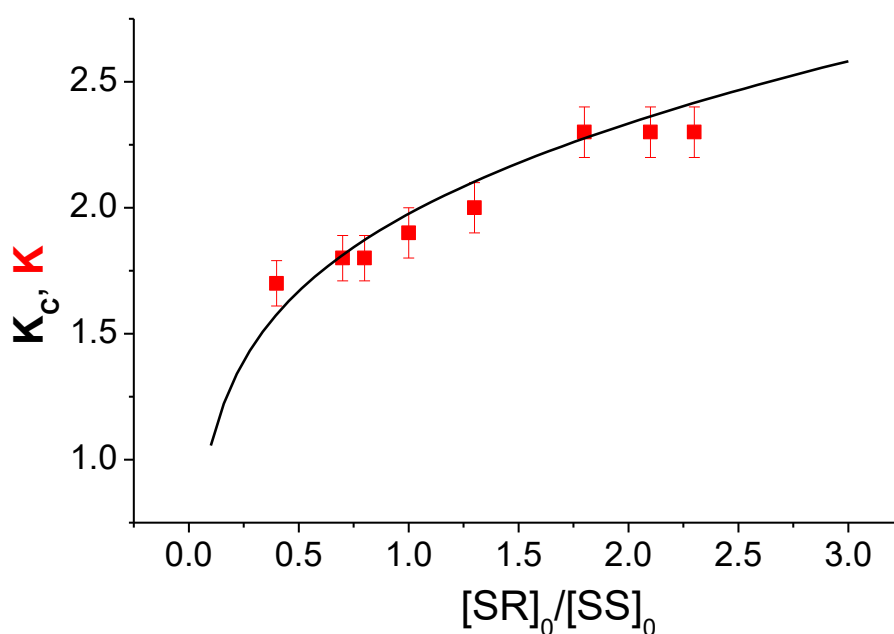

**Figure S1.** Experimental ( $K$ ) and calculated ( $K_c$ ) dependences of the CIDNP on the diastereomers (R,S)NPX-Pyr dyad concentrations ratio. Calculation parameters:  $\alpha_{SR}=2$ ,  $\alpha_{SS}=1$ ,  $\beta_{SR}=0.1$ ,  $\beta_{SS}=0.1$ ,  $\gamma=0$ ; dimerization equilibrium constants:  $K_{RS}=2\times 10^5$  M<sup>-1</sup>,  $K_{SS}=2\times 10^5$  M<sup>-1</sup>,  $K_{RS,SS}=1\times 10^5$  M<sup>-1</sup>. Here,  $\alpha$ ,  $\beta$  and  $\gamma$  are the efficiencies of polarization formation in homo-, hetero-dimers and monomers.

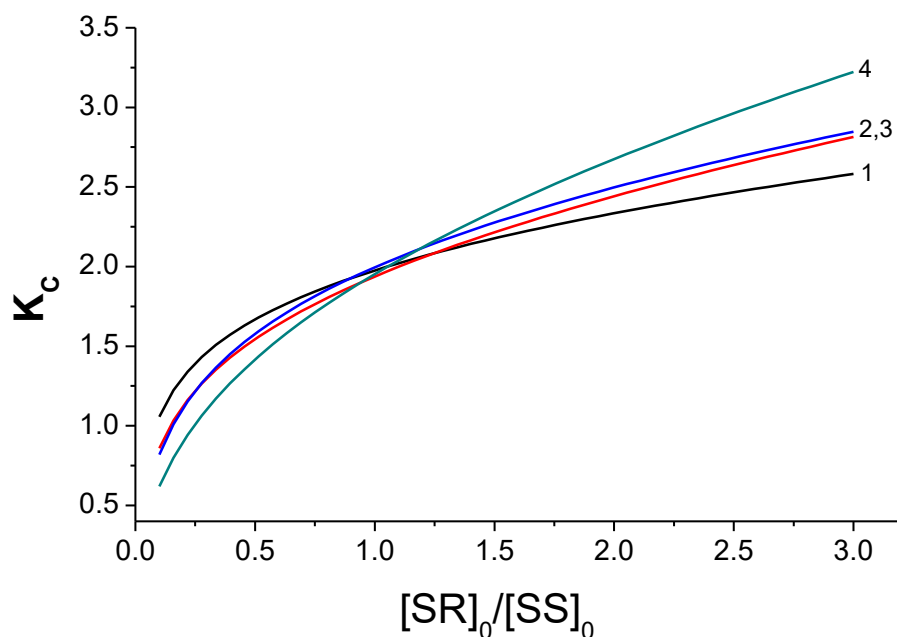

**Figure S2.** Calculated ( $K_c$ ) dependences of the CIDNP on the diastereomers (R,S)NPX-Pyr dyad concentrations ratio with different dimerization equilibrium constants. Calculation parameters:  $\alpha_{SR}=2$ ,  $\alpha_{SR}=1$ ,  $\beta_{SR}=0.1$ ,  $\beta_{SS}=0.1$ ,  $\gamma=0$ . Dimerization equilibrium constants: 1)  $K_{SR,SR}=2\times 10^5 \text{ M}^{-1}$ ,  $K_{SS,SS}=2\times 10^5 \text{ M}^{-1}$ ,  $K_{SR,SS}=1\times 10^5 \text{ M}^{-1}$ ; 2)  $K_{SR,SR}=1\times 10^5 \text{ M}^{-1}$ ,  $K_{SS,SS}=2\times 10^5 \text{ M}^{-1}$ ,  $K_{SR,SS}=1\times 10^5 \text{ M}^{-1}$ ; 3)  $K_{SR,SR}=2\times 10^5 \text{ M}^{-1}$ ,  $K_{SS,SS}=1\times 10^5 \text{ M}^{-1}$ ,  $K_{SR,SS}=1\times 10^5 \text{ M}^{-1}$ ; 4)  $K_{SR,SR}=2\times 10^5 \text{ M}^{-1}$ ,  $K_{SS,SS}=2\times 10^5 \text{ M}^{-1}$ ,  $K_{SR,SS}=2\times 10^5 \text{ M}^{-1}$ . Here,  $\alpha$ ,  $\beta$  and  $\gamma$  are the efficiencies of polarization formation in homo-, hetero-dimers and monomers.

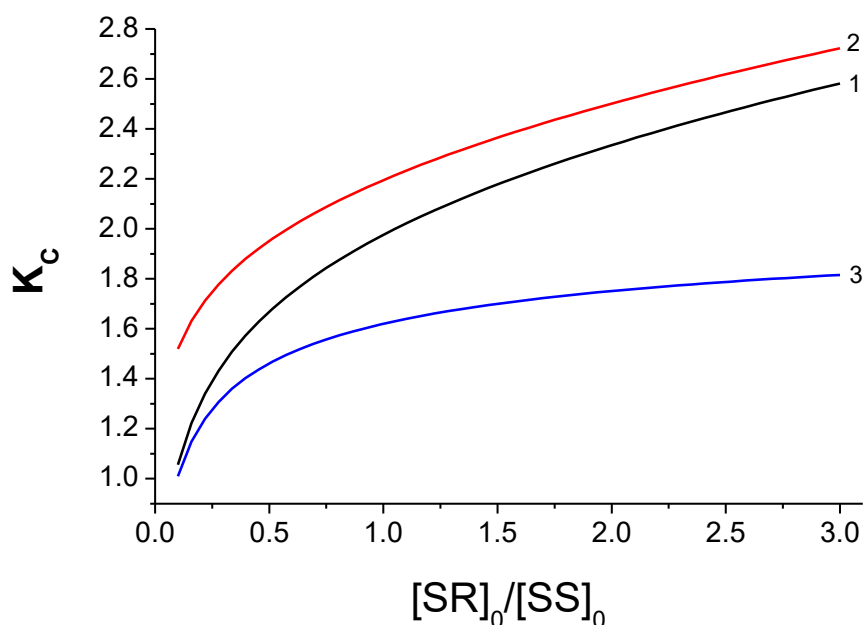

**Figure S3.** Calculated ( $K_c$ ) dependences of the CIDNP on the diastereomers (R,S)NPX-Pyr dyad concentrations ratio with different  $\beta$ . Calculation parameters:  $\alpha_{SR}=1.8$ ,  $\alpha_{SS}=1$ ,  $\gamma=0$ ; dimerization equilibrium constants:  $K_{RS}=2\times 10^5 \text{ M}^{-1}$ ,  $K_{SS}=2\times 10^5 \text{ M}^{-1}$ ,  $K_{RS,SS} = 1\times 10^5 \text{ M}^{-1}$ . 1)  $\beta_{SR}=0.1$ ,  $\beta_{SS}=1$ ; 2)  $\beta_{SR}=0.1$ ,  $\beta_{SS}=1$ ; 3)  $\beta_{SR}=0.1$ ,  $\beta_{SS}=1$ ; Here,  $\alpha$ ,  $\beta$  and  $\gamma$  are the efficiencies of polarization formation in homo-, hetero-dimers and monomers.

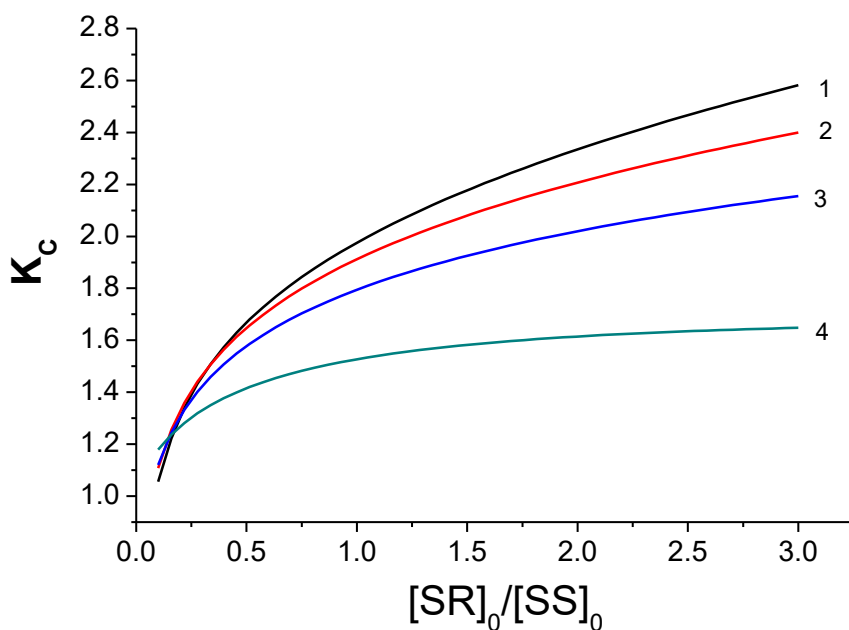

**Figure S4.** Calculated ( $K_c$ ) dependences of the CIDNP on the diastereomers (R,S)NPX-Pyr dyad concentrations ratio with different dimerization equilibrium constants, taking into account  $\gamma$ . Calculation parameters:  $\alpha_{SR}=2$ ,  $\alpha_{SR}=1$ ,  $\beta_{SR}=0.1$ ,  $\beta_{SS}=0.1$ . Dimerization equilibrium constants: 1)  $\gamma=0$ ,  $K_{SR,SR}=2\times 10^5$ ,  $K_{SS,SS}=2\times 10^5$ ,  $K_{SR,SS}=1\times 10^5 \text{ M}^{-1}$ ; 2)  $\gamma=1$ ,  $K_{SR,SR}=2\times 10^5 \text{ M}^{-1}$ ,  $K_{SS,SS}=2\times 10^5 \text{ M}^{-1}$ ,  $K_{SR,SS}=1\times 10^5 \text{ M}^{-1}$ ; 3)  $\gamma=1$ ,  $K_{SR,SR}=2\times 10^4 \text{ M}^{-1}$ ,  $K_{SS,SS}=2\times 10^4 \text{ M}^{-1}$ ,  $K_{SR,SS}=1\times 10^4 \text{ M}^{-1}$ ; 4)  $\gamma=1$ ,  $K_{SR,SR}=2\times 10^3 \text{ M}^{-1}$ ,  $K_{SS,SS}=2\times 10^3 \text{ M}^{-1}$ ,  $K_{SR,SS}=1\times 10^3 \text{ M}^{-1}$ . Here,  $\alpha$ ,  $\beta$  and  $\gamma$  are the efficiencies of polarization formation in homo-, hetero-dimers and monomers.

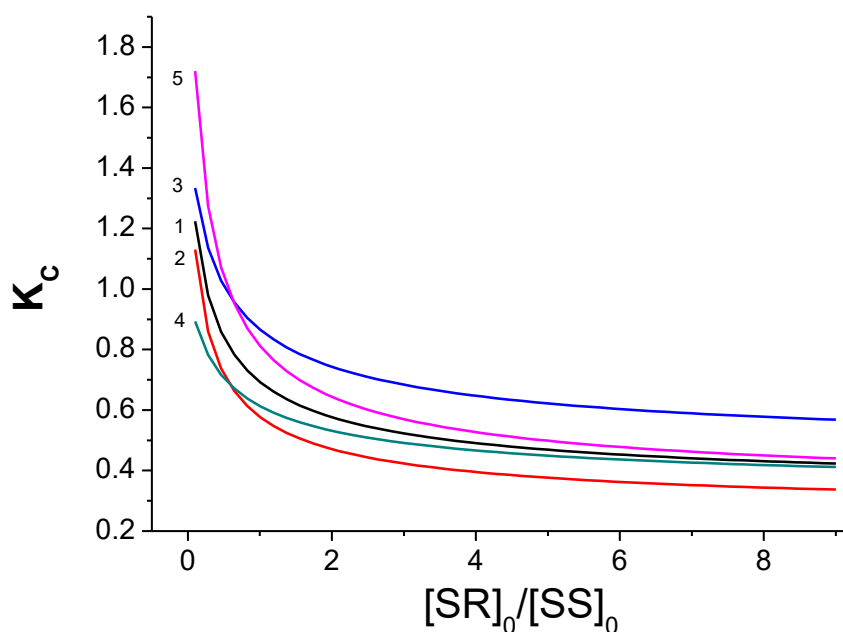

**Figure S5.** Calculated ( $K_c$ ) dependences of the CIDNP on the diastereomers (R,S)NPX-Trp dyad concentrations ratio with different  $\beta$ . Calculation parameters:  $\alpha_{SR}=1.8$ ,  $\alpha_{SS}=1$ ,  $\gamma=0$ ; dimerization equilibrium constants:  $K_{RS} = 2 \times 10^5 \text{ M}^{-1}$ ,  $K_{SS} = 2 \times 10^5 \text{ M}^{-1}$ ,  $K_{RS,SS} = 2 \times 10^5 \text{ M}^{-1}$ . 1)  $\beta_{SR}=1.6$ ,  $\beta_{SS}=5.5$ ; 2)  $\beta_{SR}=1.6$ ,  $\beta_{SS}=7$ ; 3)  $\beta_{SR}=1.6$ ,  $\beta_{SS}=4$ ; 4)  $\beta_{SR}=1$ ,  $\beta_{SS}=5.5$ ; 5)  $\beta_{SR}=2.5$ ,  $\beta_{SS}=5.5$ . Here,  $\alpha$ ,  $\beta$  and  $\gamma$  are the efficiencies of polarization formation in homo-, hetero-dimers and monomers.

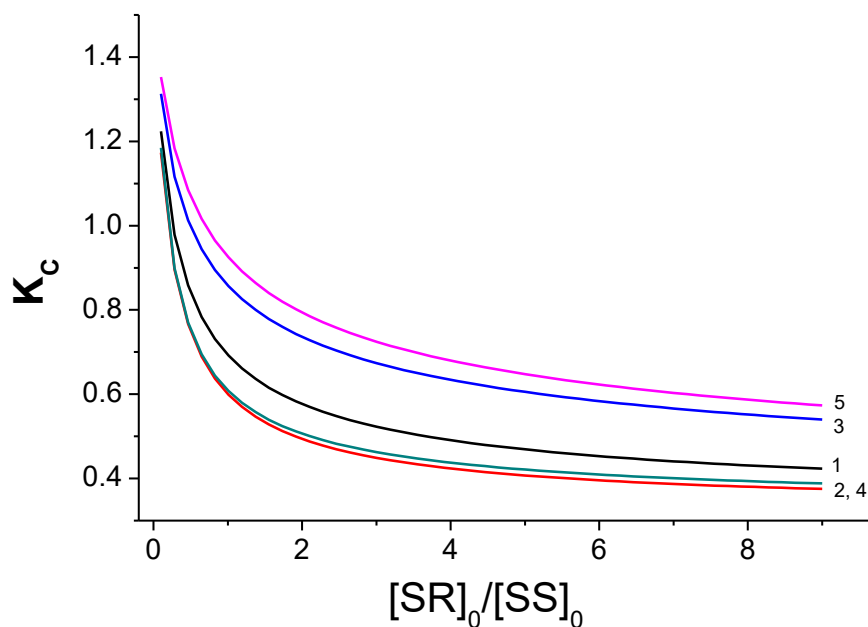

**Figure S6.** Calculated ( $K_c$ ) dependences of the CIDNP on the diastereomers (R,S)NPX-Trp dyad concentrations ratio with different dimerization equilibrium constants. Calculation parameters:  $\alpha_{SR}=1.8$ ,  $\alpha_{SR}=1$ ,  $\beta_{SR}=1.6$ ,  $\beta_{SS}=5.5$ ,  $\gamma=0$ .

Dimerization equilibrium constants: 1)  $K_{SR,SR}=2\times 10^5\text{ M}^{-1}$ ,  $K_{SS,SS}=2\times 10^5\text{ M}^{-1}$ ,  $K_{SR,SS}=2\times 10^5\text{ M}^{-1}$ ; 2)  $K_{SR,SR}=1\times 10^5$ ,  $K_{SS,SS}=2\times 10^5\text{ M}^{-1}$ ,  $K_{SR,SS}=2\times 10^5\text{ M}^{-1}$ ; 3)  $K_{SR,SR}=5\times 10^5\text{ M}^{-1}$ ,  $K_{SS,SS}=2\times 10^5\text{ M}^{-1}$ ,  $K_{SR,SS}=2\times 10^5\text{ M}^{-1}$ ; 4)  $K_{SR,SR}=2\times 10^5\text{ M}^{-1}$ ,  $K_{SS,SS}=1\times 10^5\text{ M}^{-1}$ ,  $K_{SR,SS}=2\times 10^5\text{ M}^{-1}$ ; 5)  $K_{SR,SR}=2\times 10^5\text{ M}^{-1}$ ,  $K_{SS,SS}=2\times 10^5\text{ M}^{-1}$ ,  $K_{SR,SS}=1\times 10^5\text{ M}^{-1}$ . Here,  $\alpha$ ,  $\beta$  and  $\gamma$  are the efficiencies of polarization formation in homo-, hetero-dimers and monomers.

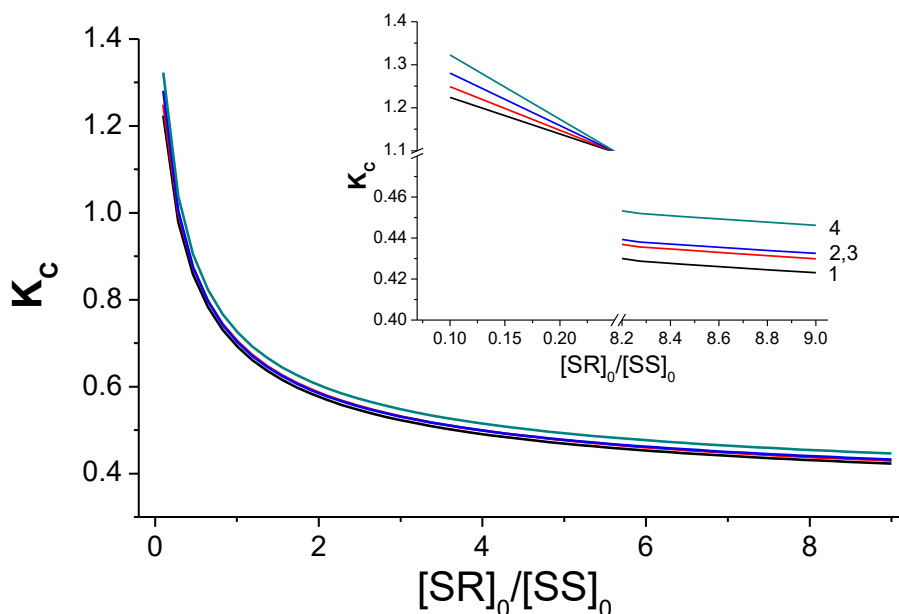

**Figure S7.** Calculated ( $K_c$ ) dependences of the CIDNP on the diastereomers (R,S)NPX-Trp dyad concentrations ratio with different  $\gamma$  at height dimerization equilibrium constants. Calculation parameters:  $\alpha_{SR}=1.8$ ,  $\alpha_{SR}=1$ ,  $\beta_{SR}=1.6$ ,  $\beta_{SS}=5.5$ . Dimerization equilibrium constants  $\gamma$ .  $K_{SR,SR}=2\times 10^5\text{ M}^{-1}$ ,  $K_{SS,SS}=2\times 10^5\text{ M}^{-1}$ ,  $K_{SR,SS}=2\times 10^5\text{ M}^{-1}$  1)  $\gamma=0$ ; 2)  $\gamma=2$ ; 3)  $\gamma=5$ ; 4)  $\gamma=5$ . Here,  $\alpha$ ,  $\beta$  and  $\gamma$  are the efficiencies of polarization formation in homo-, hetero-dimers and monomers

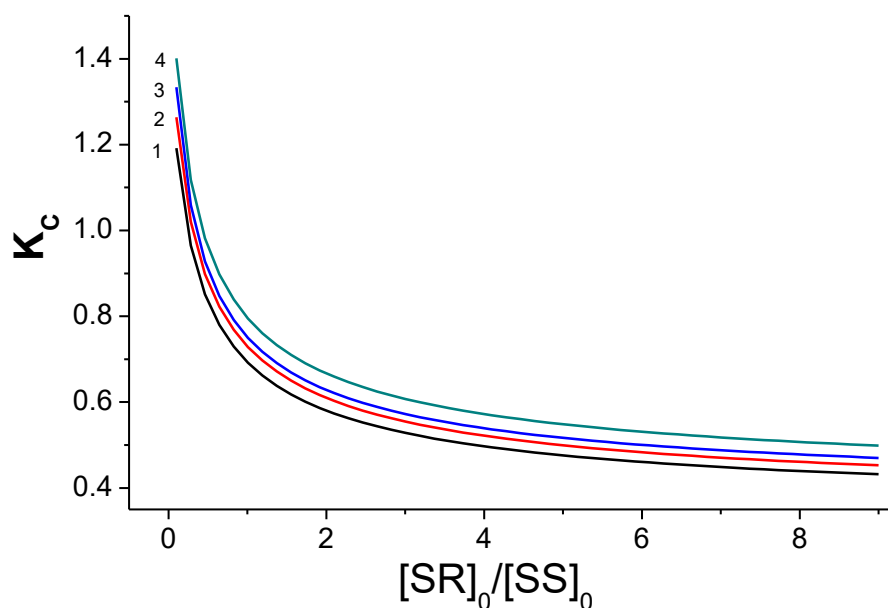

**Figure S8.** Calculated ( $K_c$ ) dependences of the CIDNP on the diastereomers (R,S)NPX-Trp dyad concentrations ratio with different  $\gamma$  at medium dimerization equilibrium constants. Calculation parameters:  $\alpha_{SR}=1.8$ ,  $\alpha_{SR}=1$ ,  $\beta_{SR}=1.6$ ,  $\beta_{SS}=5.5$ . Dimerization equilibrium constants  $\gamma$ .  $K_{SR,SR}=2 \times 10^4 \text{ M}^{-1}$ ,  $K_{SS,SS}=2 \times 10^4 \text{ M}^{-1}$ ,  $K_{SR,SS}=2 \times 10^4 \text{ M}^{-1}$  1)  $\gamma=0$ ; 2)  $\gamma=2$ ; 3)  $\gamma=5$ ; 4)  $\gamma=10$ . Here,  $\alpha$ ,  $\beta$  and  $\gamma$  are the efficiencies of polarization formation in homo-, hetero-dimers and monomers.

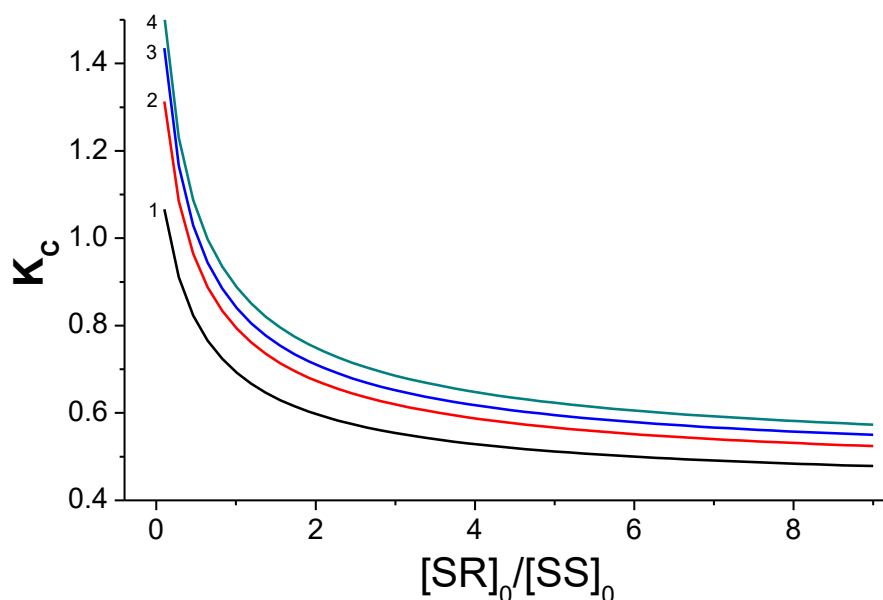

**Figure S9.** Calculated ( $K_c$ ) dependences of the CIDNP on the diastereomers (R,S)NPX-Trp dyad concentrations ratio with different  $\gamma$  at low dimerization equilibrium constants. Calculation parameters:  $\alpha_{SR}=1.8$ ,  $\alpha_{SR}=1$ ,  $\beta_{SR}=1.6$ ,  $\beta_{SS}=5.5$ .

Dimerization equilibrium constants  $\gamma$ .  $K_{SR,SR}=2\times 10^3$ ,  $K_{SS,SS}=2\times 10^3$ ,  $K_{SR,SS}=2\times 10^3$ . 1)  $\gamma=0$ ; 2)  $\gamma=2$ ; 3)  $\gamma=5$ ; 4)  $\gamma=10$ . Here,  $\alpha$ ,  $\beta$  and  $\gamma$  are the efficiencies of polarization formation in homo-, hetero-dimers and monomers.
